# Supplementary figures and images for: A comparative investigation between paclitaxel nanoparticle- and nanocrystal-loaded thermosensitive PECT hydrogels for peri-tumoural administration
Source: Royal Society of Chemistry journal article supplement (doi:10.1039/c6nr05498f), 2016-01-01

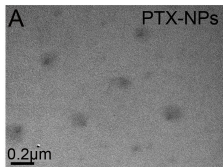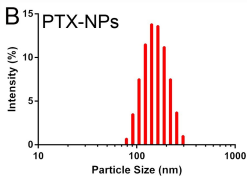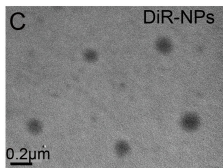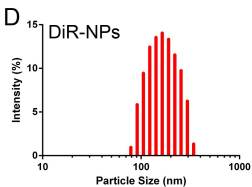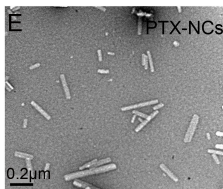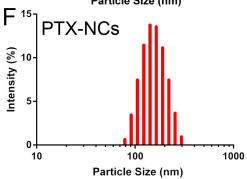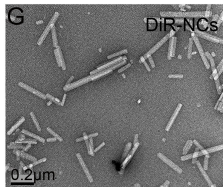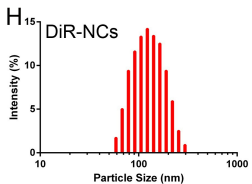

Supplement: c6nr05498f1.pdf [file c6nr05498f1.pdf]

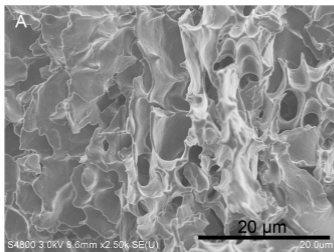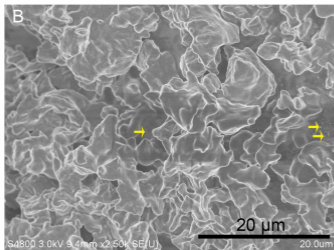

Supplement: c6nr05498f2.pdf [file c6nr05498f2.pdf]
